# Supplementary material
Source: publisher site journal article supplement (https://www.spandidos-publications.com/2317/downloadSupplementary)
Supplement: Supplementary file 1 [file downloadSupplementary]

Figure S1. KEL-FIB cells before scratching. (A) Images of KEL-FIB cells transfected with miR-194-5p mimic, miR-194-5p inhibitor or NC before scratching (magnification, x100). (B) Images of KEL-FIB cells transfected with si-NR2F2 or NC before scratching (magnification, x100). KEL-FIB, human keloid fibroblasts; miR, microRNA; NC, negative control; si, small interfering RNA.

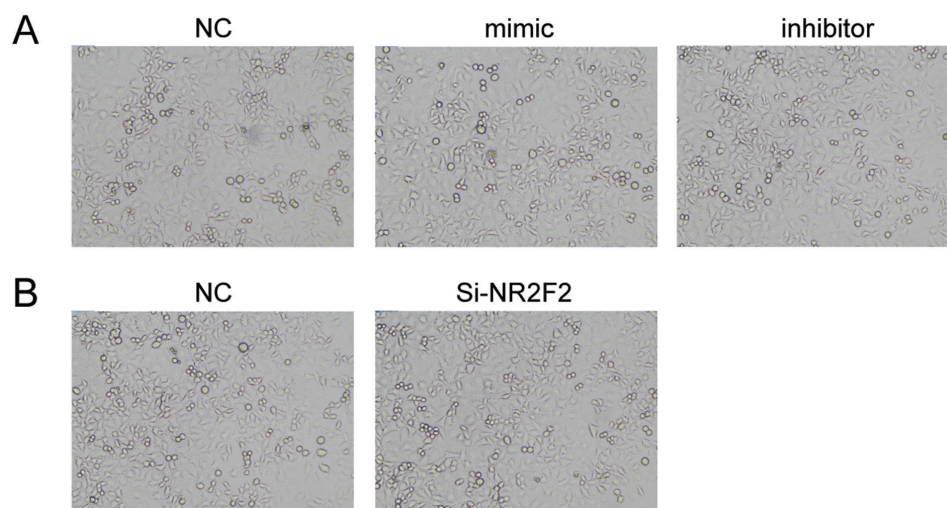

Table SI. Sequences of miR-194-5p mimic, miR-194-5p inhibitor, si-NR2F2 and NC.

| Gene                                                                                                               | Sequence (5'→3')                                     |
|--------------------------------------------------------------------------------------------------------------------|------------------------------------------------------|
| miR-194-5p mimic                                                                                                   | AAGGCAGGGCCCCCGCUCCCC                                |
| miR-194-5p inhibitor                                                                                               | GGAGCGGGGGCCCUGCCUUUU                                |
| miR-mimic NC                                                                                                       | UCACAACCUCCUAGAAAGAGUAGA                             |
| miR-inhibitor NC                                                                                                   | UUGUACUACACAAAAGUACUG                                |
| si-NR2F2                                                                                                           | F: GAUCGUUCAAGCAAGCUAAUC<br>R: UUAGCUUGCUUGAACGAUCUU |
| miR, microRNA; NR2F2, nuclear receptor subfamily 2 group F member 2; NC, negative control; F, forward; R, reverse. |                                                      |

Table SII. Sequences of primers used for the construction of dual-luciferase reporter gene assay vectors.

| Gene  | Sequence (5'→3')                                     |
|-------|------------------------------------------------------|
| NR2F2 | F: CCTCGAGGTAAAGTTAGTGTG<br>R: GTTTCGTTTAAACGCCGCGTT |

NR2F2, nuclear receptor subfamily 2 group F member 2; F, forward; R, reverse.
